# Supplementary material for: Synthesis of nano-scale TiO2 particles by a nonhydrolytic approachElectronic supplementary information (ESI) available: TG analysis of the precursors; particle size distribution analysis of TiO2 nanocrystals dispersed in toluene; XRD analysis of TiO2 nanocrystals with and without glass substrate background. See http://www.rsc.org/suppdata/jm/b2/b202767d/
Source: Royal Society of Chemistry journal article supplement (doi:10.1039/b202767d), 2002-05-01

## XRD analysis of TiO<sub>2</sub> nanocrystals

- (a) With glass substrate background
- (b) After subtracting the background

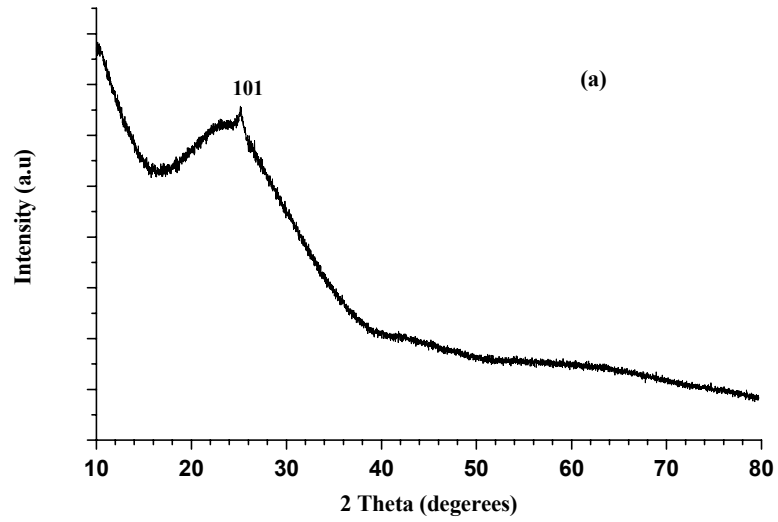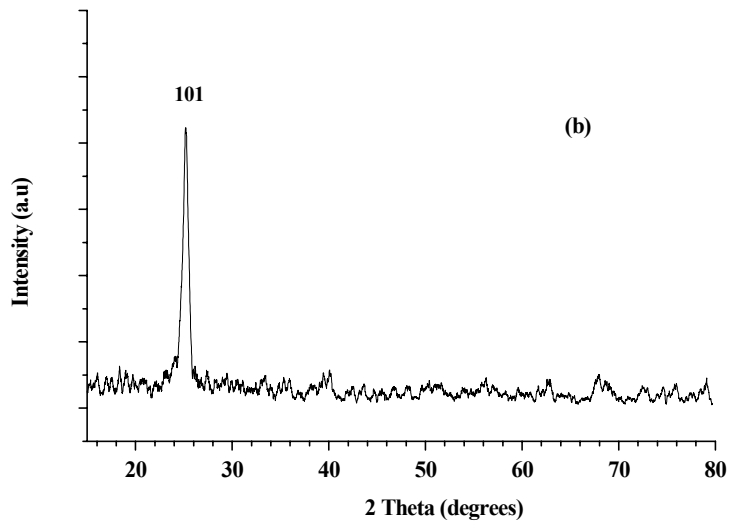

Supplement: b202767d3.pdf [file b202767d3.pdf]
